# Supplementary material
Source: HighWire-hosted journal article supplement (https://endocrinology-journals.org/content/suppl/2014/03/21/JME-14-0013)

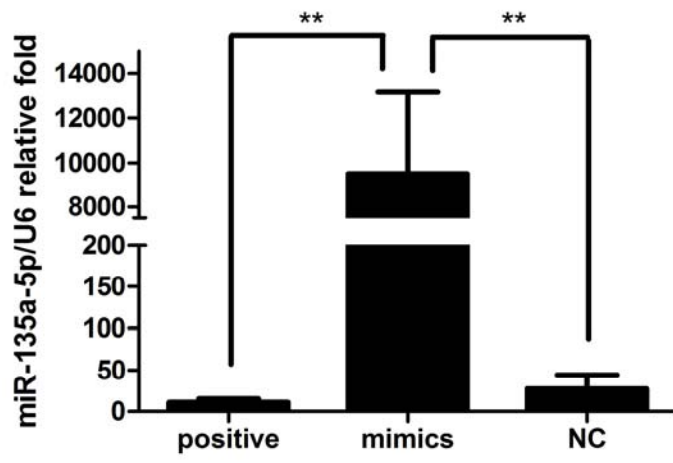

Supplement: Supplementary_figure_1.pdf [file Supplementary_figure_1.pdf]
